# Supplementary material for: Sex‐biased survival contributes to population decline in a long‐lived seabird, the Magellanic Penguin
Source: PubMed Central journal article supplement — Ecol Appl. 2019 Jan 2;29(1):e01826. doi: 10.1002/eap.1826 (PMC6849821; doi:10.1002/eap.1826), 2019-01-02
Supplement: EAP-29-na-s002.pdf [file EAP-29-na-s002.pdf]

**Supporting Information.** Sex-biased survival contributes to population decline in a long-lived seabird, the Magellanic penguin. N. J. Gownaris and P. D. Boersma. *Ecological Applications*. 2018.

**Appendix S2: Supplementary Tables**

**Table S1:** Phase 1 Candidate Model  $\Delta_{QAIC}$  as Compared to the Best-Supported Magellanic Penguin Mark-Recapture Model (QAIC = 41,574; Aikake weight  $\sim 1.0$ )

|              | $p_{bst}$ | $p_{bt}$ | $p_{bs}$ | $p_b$ |
|--------------|-----------|----------|----------|-------|
| $\Phi_{sat}$ | <b>0</b>  | 452      | 976      | 931   |
| $\Phi_{sa}$  | 1351      | 1542     | 2516     | 2494  |
| $\Phi_{at}$  | 52        | 403      | 739      | 1177  |
| $\Phi_{st}$  | 1350      | 2958     | 3723     | 4020  |
| $\Phi_s$     | 3364      | 3807     | 4862     | 5390  |
| $\Phi_a$     | 1418      | 2045     | 2616     | 2825  |
| $\Phi_t$     | 2763      | 3417     | 3869     | 4409  |

|                 | $\Phi$ (survival) | p (recapture) |
|-----------------|-------------------|---------------|
| sex             | s                 | s             |
| time            | t                 | t             |
| age (factor)    | a                 | -             |
| breeding status | -                 | b             |

For this population, the best-supported mark-recapture model from Phase 1 of model selection was the most general model tested. This model accounted for additive effects of sex, age, and time in survival and of breeding status, sex, and time in recapture and had 110 parameters (QAIC = 41,574; Aikake weight  $\sim 1.0$ ). In all cases, models that accounted for sex had greater support than those that did not.

**Table S2:** Phase Two (Top Table) and Phase Three (Bottom Table) Magellanic Penguin Mark-Recapture Candidate Models

| Phase 2                 |     | 1-18 yrs | ≥19 yrs  | QAIC    | k       | ΔQAIC <sub>-s</sub> |                     |
|-------------------------|-----|----------|----------|---------|---------|---------------------|---------------------|
| <i>General Model</i>    |     |          |          |         |         |                     |                     |
|                         | s + | t + a    | t + a    | 41,574  | 110     | 52                  |                     |
| <i>Age Class Models</i> |     |          |          |         |         |                     |                     |
| s +                     |     | t + a    | .        | 41,446  | 125     | 64                  |                     |
|                         |     | t + a    | t        | 41,443  | 137     | 62                  |                     |
|                         |     | t + a    | A        | 41,425  | 126     | 64                  |                     |
| s +                     |     | t        | .        | 41,495  | 108     | 65                  |                     |
|                         |     | t        | t        | 41,490  | 118     | 64                  |                     |
|                         |     | t        | A        | 41,482  | 107     | 56                  |                     |
| s +                     |     | .        | .        | 41,514  | 79      | 180                 |                     |
|                         |     | .        | t        | 41,512  | 90      | 69                  |                     |
|                         |     | .        | A        | 41,491  | 78      | 93                  |                     |
| Phase 3                 |     | BS       | 1-18 yrs | ≥19 yrs | QAIC    | k                   | ΔQAIC <sub>-s</sub> |
| s +                     |     | BS1 +    | t + a    | A       | 41,416  | 127                 | 64                  |
|                         |     | BS2 +    | t + a    | A       | 41,414* | 127                 | 64                  |
|                         |     | BS3 +    | t + a    | A       | 41,416  | 128                 | 64                  |

s - sex  
t - time  
a - age (factor)  
A - age (linear)

BS1 – Breeders vs. Pre-Breeders and Non-Breeders  
BS2 – Pre-Breeders vs. Breeders and Non-Breeders  
BS3 – Pre-Breeders vs. Breeders vs. Non-Breeders  
. - no additional variable

k - number of parameters  
\* - best supported model  
ΔQAIC<sub>-s</sub> - difference in AIC when sex is excluded

All models included sex as an additive variable and removing sex always led to an increase in QAIC of >50 (ΔQAIC<sub>-s</sub>). The best supported model resulting from Phase 2 of the model selection procedure (top table) allowed for survival of juveniles (not shown) to vary with time, of middle-aged adults (1-18 yrs old) to vary with time and age, and of elder adults (≥ 19 yrs old) to decrease linearly as a function of age. This model was used as the starting point for Phase 3 of model selection, which resulted in the most parsimonious model and showed that the survival of pre-breeders differed from that of breeders and non-breeders.

**Table S3:** Survival and Fecundity Parameters Used in the Time-Variant and Time-Invariant Matrices

| Parameters              | Description                                        | Average Survival<br>( $\pm$ SD across ages/years) | Average Survival 1990-2009<br>( $\pm$ SD across ages/years) |
|-------------------------|----------------------------------------------------|---------------------------------------------------|-------------------------------------------------------------|
| $\Phi_{\varnothing J}$  | Survival Female Juveniles (Age 0)                  | 0.12 ( $\pm$ 0.10) <sup>B</sup>                   | 0.16 ( $\pm$ 0.11) <sup>C</sup>                             |
| $\Phi_{\sigma J}$       | Survival Male Juveniles (Age 0)                    | 0.17 ( $\pm$ 0.14) <sup>B</sup>                   | 0.19 ( $\pm$ 0.14) <sup>C</sup>                             |
| $\Phi_{\varnothing P}$  | Survival Female Prebreeders (Age 1-5) <sup>A</sup> | 0.92 ( $\pm$ 0.11) <sup>B</sup>                   | 0.94 ( $\pm$ 0.04) <sup>C</sup>                             |
| $\Phi_{\sigma P}$       | Survival Male Prebreeders (Age 1-6) <sup>A</sup>   | 0.95 ( $\pm$ 0.10) <sup>B</sup>                   | 0.91 ( $\pm$ 0.06) <sup>C</sup>                             |
| $\Phi_{\varnothing BA}$ | Survival Female Breeders (Age 6-18)                | 0.88 ( $\pm$ 0.07) <sup>B</sup>                   | 0.87 ( $\pm$ 0.07) <sup>C</sup>                             |
| $\Phi_{\sigma BA}$      | Survival Male Breeders (Age 7-18)                  | 0.92 ( $\pm$ 0.05) <sup>B</sup>                   | 0.92 ( $\pm$ 0.05) <sup>C</sup>                             |
| $\Phi_{\varnothing BE}$ | Survival Female Breeders (Age $\geq$ 19)           | 0.70 ( $\pm$ 0.16) <sup>B</sup>                   | 0.80 ( $\pm$ 0) <sup>C</sup>                                |
| $\Phi_{\sigma BE}$      | Survival Male Breeders (Age $\geq$ 19)             | 0.78 ( $\pm$ 0.14) <sup>B</sup>                   | 0.92 ( $\pm$ 0) <sup>C</sup>                                |
| <b>HSR</b>              | Hatching Sex Ratio                                 | 0.50 <sup>D</sup>                                 | 0.50 <sup>D</sup>                                           |
| $\Phi_C$                | Reproductive Success                               | 0.50 $\pm$ 0.26 <sup>E</sup>                      | 0.55 $\pm$ 0.27 <sup>F</sup>                                |

<sup>A</sup> 50% of females breed by age six and 50% of males breed by age seven (Boersma et al., 2013)

<sup>B</sup> Year- and age-averaged values for 1983-2014 as estimated from the mark-recapture model in this study

<sup>C</sup> Year-specific, age-averaged values for 1990-2009 as estimated from the mark-recapture model in this study

<sup>D</sup> Based on the proportion of males: Koehn et al., 2016; Ciancio et al., 2017

<sup>E</sup> Based on two egg clutch: Boersma, unpublished data

<sup>F</sup> Based on two egg clutch: Rebstock & Boersma 2017

**Table S4:** Predicted Magellanic Penguin Population Change 1990-2009 Based on a Juvenile Survival Fitness Landscape Analysis

| → Increase Male Survival   |                                           |      |      |      |      |      | → Increase Male Survival   |                                         |      |      |      |      |      |      |
|----------------------------|-------------------------------------------|------|------|------|------|------|----------------------------|-----------------------------------------|------|------|------|------|------|------|
| 0.0 0.1 0.2 0.3 0.4 0.5    |                                           |      |      |      |      |      | 0.0 0.1 0.2 0.3 0.4 0.5    |                                         |      |      |      |      |      |      |
| ↓ Increase Female Survival | <i>No. Females; Sex-Specific Survival</i> |      |      |      |      |      | ↓ Increase Female Survival | <i>No. Males; Sex-Specific Survival</i> |      |      |      |      |      |      |
|                            | 0                                         | -85% | -85% | -85% | -85% | -85% |                            | 0                                       | -73% | -59% | -45% | -32% | -18% | -4%  |
|                            | 0.1                                       | -73% | -73% | -73% | -73% | -73% |                            | 0.1                                     | -70% | -55% | -40% | -24% | -9%  | 6%   |
|                            | 0.2                                       | -62% | -59% | -59% | -59% | -59% |                            | 0.2                                     | -69% | -50% | -34% | -17% | 0%   | 16%  |
|                            | 0.3                                       | -52% | -46% | -43% | -43% | -43% |                            | 0.3                                     | -69% | -49% | -29% | -11% | 7%   | 25%  |
|                            | 0.4                                       | -42% | -35% | -27% | -24% | -24% |                            | 0.4                                     | -69% | -49% | -26% | -5%  | 14%  | 33%  |
| 0.5                        | -33%                                      | -23% | -14% | -6%  | -4%  | 0.5  | -69%                       | -49%                                    | -26% | -1%  | 21%  | 42%  |      |      |
| ↓ Increase Female Survival | <i>No. Females; Sex-Averaged Survival</i> |      |      |      |      |      | ↓ Increase Female Survival | <i>No. Males; Sex-Averaged Survival</i> |      |      |      |      |      |      |
|                            | 0                                         | -78% | -77% | -77% | -77% | -77% |                            | 0                                       | -79% | -66% | -54% | -42% | -31% | -19% |
|                            | 0.1                                       | -66% | -62% | -60% | -60% | -60% |                            | 0.1                                     | -79% | -64% | -50% | -36% | -23% | -10% |
|                            | 0.2                                       | -55% | -49% | -44% | -41% | -41% |                            | 0.2                                     | -79% | -64% | -47% | -31% | -16% | -2%  |
|                            | 0.3                                       | -43% | -37% | -30% | -23% | -19% |                            | 0.3                                     | -79% | -64% | -47% | -28% | -9%  | 7%   |
|                            | 0.4                                       | -32% | -24% | -16% | -8%  | 0%   |                            | 0.4                                     | -79% | -64% | -47% | -28% | -7%  | 14%  |
| 0.5                        | -20%                                      | -11% | -2%  | 7%   | 16%  | 0.5  | -79%                       | -64%                                    | -47% | -28% | -7%  | 16%  |      |      |

Baseline apparent survival estimates used to develop the population matrix models for the analysis were either sex-specific (top half of table) or sex-averaged (bottom half of table). Annual surveys may underestimate population decline if nests with a single male present are counted as active nests. Therefore, rates of change for the male population (breeders and non-breeders; right half of table) are shown for comparison to rates of change for the effective population, which is constrained by the number of females (left half of the table).
